# Supplementary material for: Understanding Why Patients May Not Report Suicidal Ideation at a Health Care Visit Prior to a Suicide Attempt: A Qualitative Study
Source: Atypon-hosted journal article supplement (doi:10.1176/appi.ps.201800342), 2018-11-20
Supplement: appi.ps.201800342.ds001.pdf [file appi.ps.201800342.ds001.pdf]

 


Psychiatry Online
