# Supplementary material for: Understanding Why Patients May Not Report Suicidal Ideation at a Health Care Visit Prior to a Suicide Attempt: A Qualitative Study
Source: Atypon-hosted journal article supplement (doi:10.1176/appi.ps.201800342), 2018-11-20
Supplement: appi.ps.201800342.ds001.pdf [file appi.ps.201800342.ds001.pdf]

### Supplement: Understanding Attempts Interview Guide

Thank you for the opportunity to learn about your experience. We hope to have a frank discussion with you about your memories and thoughts about the injury you had on [date].

1. Please describe what happened at the time of the injury. [If the respondent accepts that it was a suicide attempt, 'injury' can be replaced by 'episode of self-harm' or 'suicide attempt'].
2. What was your state of mind and emotional state before the injury?
3. Prior to the injury, what was your relationship like with your close family members, relatives, and friends?  
~Had this relationship changed in any way from what it was like previously?
4. Prior to the injury, how was the situation with your work (studies)?
5. To what extent was this injury an intentional act to harm yourself?  
[If respondent denies it was self-inflicted] So you mean this injury was completely accidental, is that correct? If respondent continues to completely reject the idea that this injury was even partially self-inflicted, stop the interview].
6. What happened that made you think of harming yourself?
7. At the time of the act of self-harm, what problems did you think self-harm would resolve; that is, what was the goal of self-harm?  
~What do you think about this now?
8. How long had you had thoughts of self-harm before actually doing it?  
~Please describe the steps in the thought process by which your thoughts of self-harm changed in a specific plan and an actual act of self-harm.  
~Why did you decide on the specific method of self-harm that you employed?
9. At the time of harming yourself had you been drinking alcohol or using drugs?  
~Was this part of a usual pattern of drinking or using drugs for you?  
~If you hadn't been using drugs or alcohol that day do you think you still would have harmed yourself?
10. Did others know that you had thoughts of self-harm?
11. Our records show that when you visited a healthcare provider before the injury you did not endorse thoughts of death or harming yourself on a depression symptom questionnaire. We can think of many reasons why that might be, but we'd like to hear from you: Can you tell me what you were thinking when you answered that question the way you did?

[Get answer and then follow-up with below question]

We've thought of at least four potential reasons patients might not say they'd had thoughts of death or harming themselves when completing the PHQ form during regular medical care. Please rate how closely the four statements below describe your situation:

- a. You were not experiencing thoughts of death or harming yourself when you filled out the questionnaire
- b. You were experiencing thoughts of death or harming yourself, but the question did not fit your experience
- c. You were experiencing thoughts of death or harming yourself, but you didn't want to tell anyone
- d. You did experience thoughts of death or harming yourself, but not specifically when you filled out the PHQ form

[Response options includes "does not describe my situation, partially describes my situation, this fits my situation very well" – If participant does not know, record I don't know but don't offer as option immediately]

12. What do you think could have happened before the injury that might have prevented the injury?  
~What can we do differently?

13. Is there anything else I didn't ask you about that you think is important to tell us?
